# Supplementary material for: Closing the energy balance using a canopy heat capacity and storage concept – a physically based approach for the land component JSBACHv3.11
Source: Copernicus journal article supplement (doi:10.5194/gmd-11-3465-2018), 2018-08-29
Supplement: Supplementary file [file gmd-11-3465-2018-supplement-title-page.pdf › gmd-11-3465-2018-supplement-title-page.pdf]

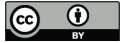

## *Supplement of*

# **Closing the energy balance using a canopy heat capacity and storage concept – a physically based approach for the land component JSBACHv3.11**

**M. Heidkamp et al.**

*Correspondence to:* Marvin Heidkamp ([marvin.heidkamp@mpimet.mpg.de](mailto:marvin.heidkamp@mpimet.mpg.de))

- [gmd-11-3465-2018-supplement-title-page.pdf](#)
- [Heidkamp.et.al.2018.Suppl.Material.2.1](#)
  - .DS\_Store
  - DICE
    - \* .DS\_Store
    - \* ForcingFile
    - \* Functions
    - \* ModelRun
    - \* PlotScripts
    - \* README
    - \* SurfaceFile
  - Global
    - \* .DS\_Store
    - \* Output
    - \* Plots
    - \* RunScripts
  - README

The copyright of individual parts of the supplement might differ from the CC BY 4.0 License.
