# Supplementary figures and images for: Closing the energy balance using a canopy heat capacity and storage concept – a physically based approach for the land component JSBACHv3.11
Source: Copernicus journal article supplement (doi:10.5194/gmd-11-3465-2018), 2018-08-29

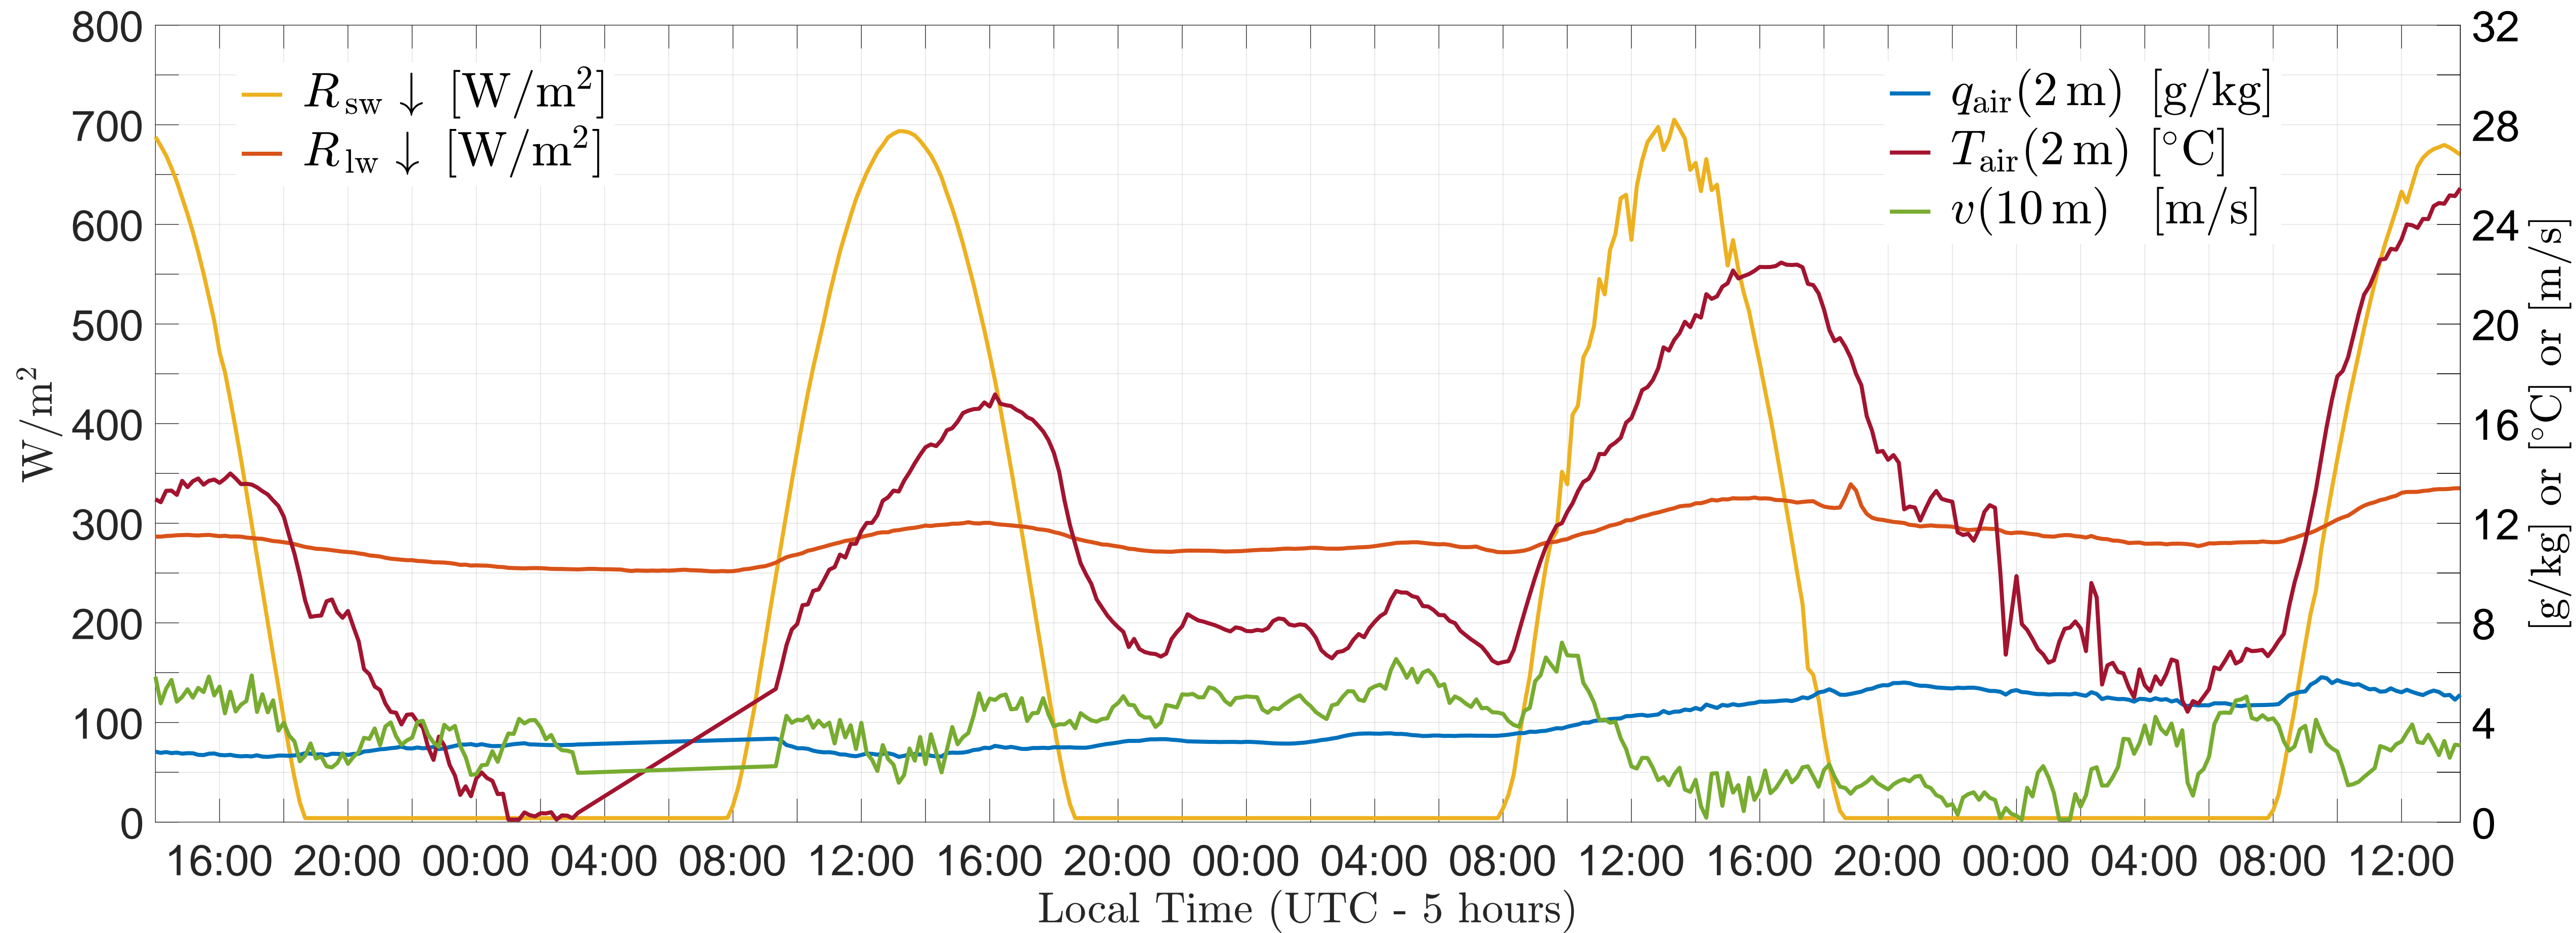

Supplement: Supplementary file 1 [file forcingPlot.pdf › Heidkamp.et.al.2018.Suppl.Material.2.1/DICE/PlotScripts/Output/forcingPlot.pdf]

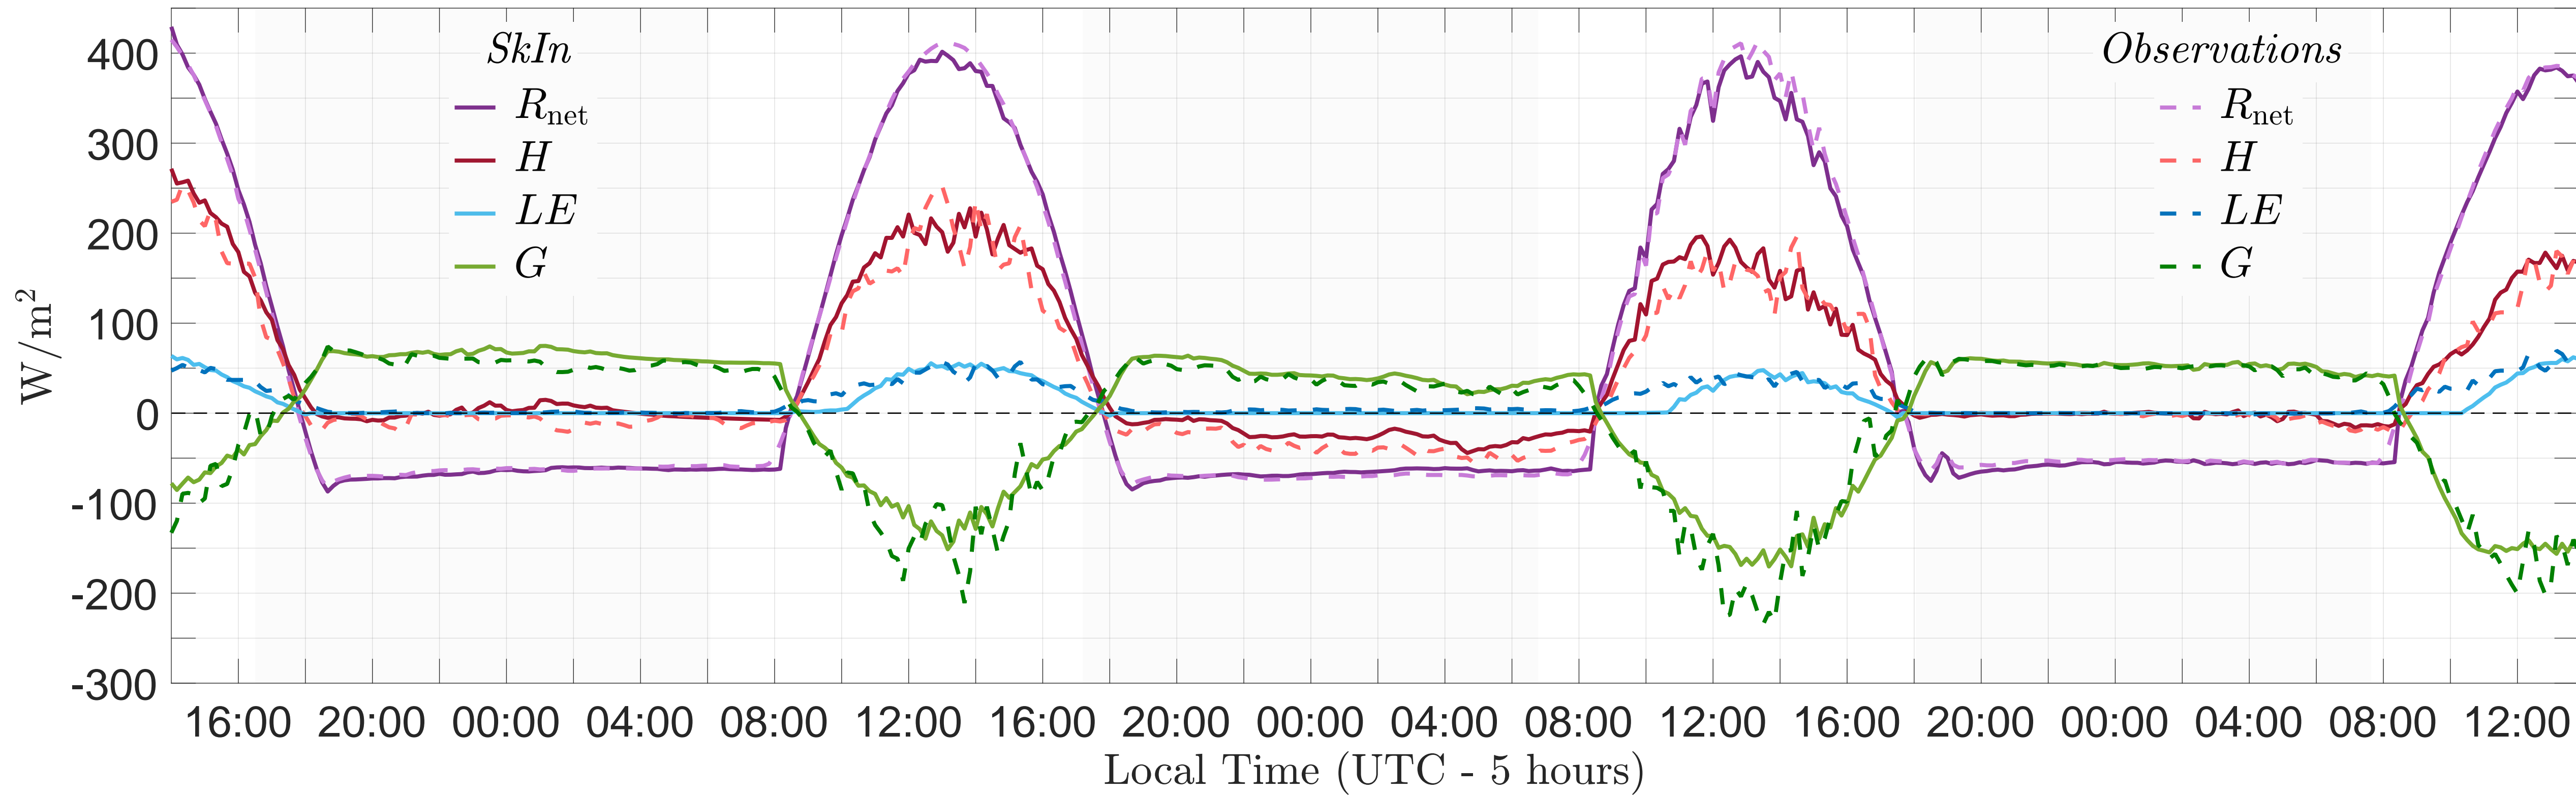

Supplement: Supplementary file 2 [file sebSinglePlot1.pdf › Heidkamp.et.al.2018.Suppl.Material.2.1/DICE/PlotScripts/Output/sebSinglePlot1.pdf]

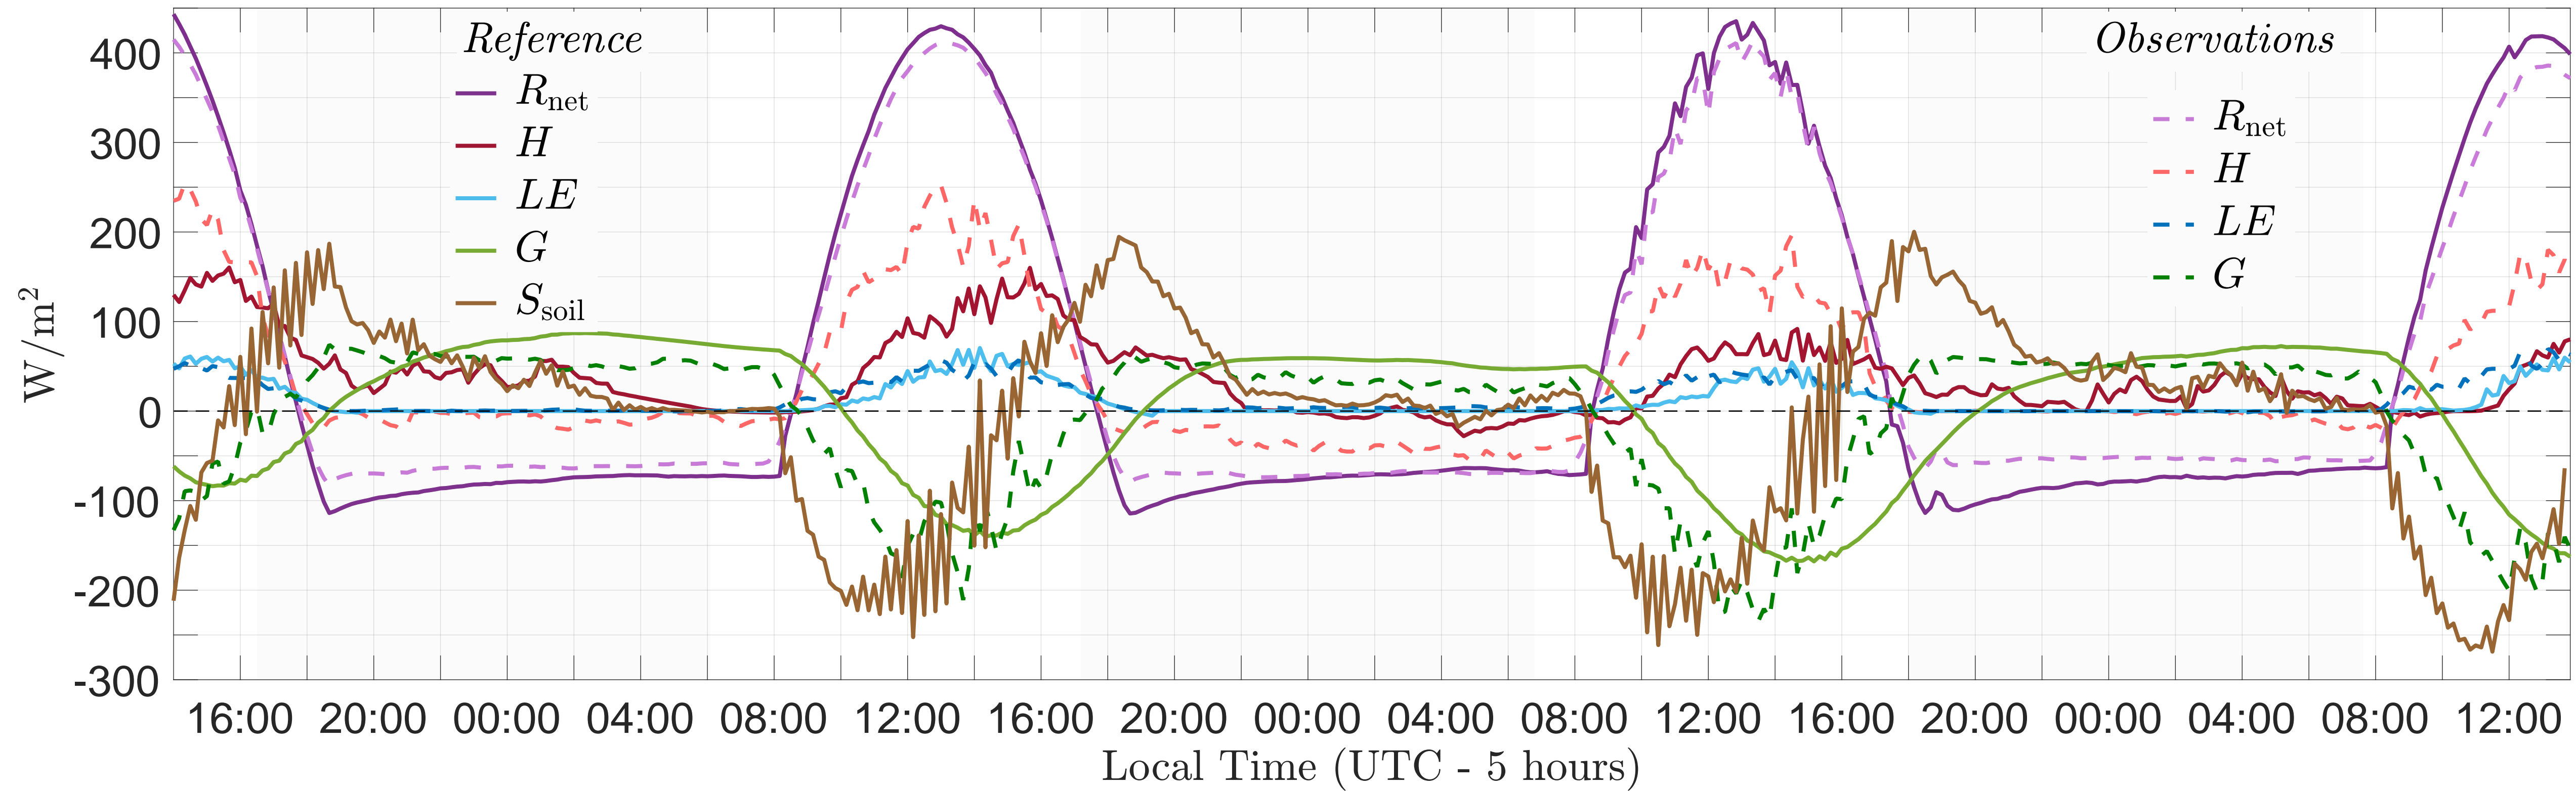

Supplement: Supplementary file 3 [file sebSinglePlot2.pdf › Heidkamp.et.al.2018.Suppl.Material.2.1/DICE/PlotScripts/Output/sebSinglePlot2.pdf]

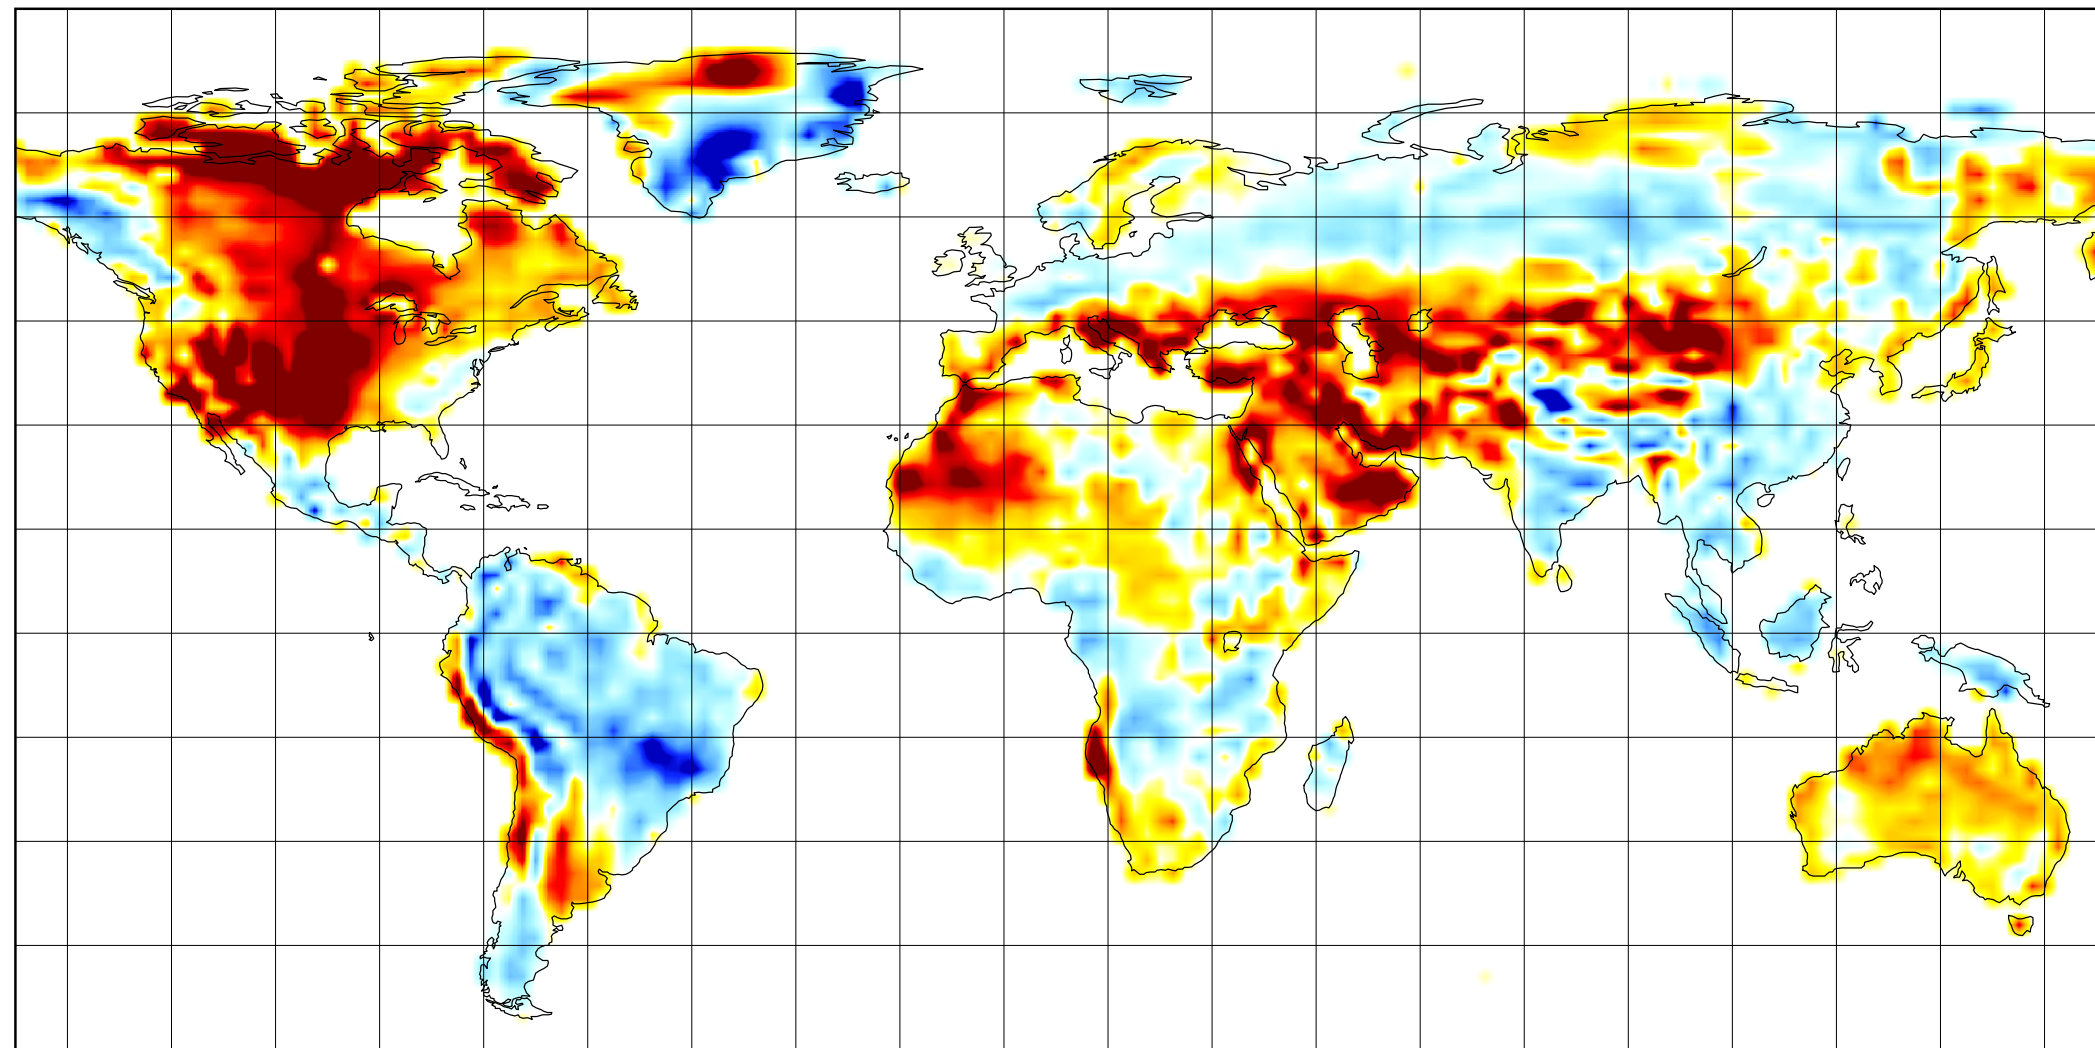

$\Delta T$  (Reference - Observations) [K]

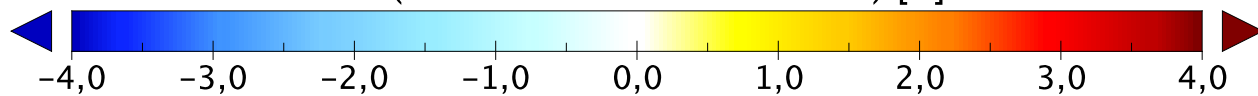

Supplement: Supplementary file 4 [file Ref-WFD.pdf › Heidkamp.et.al.2018.Suppl.Material.2.1/Global/Plots/Ref-WFD.pdf]

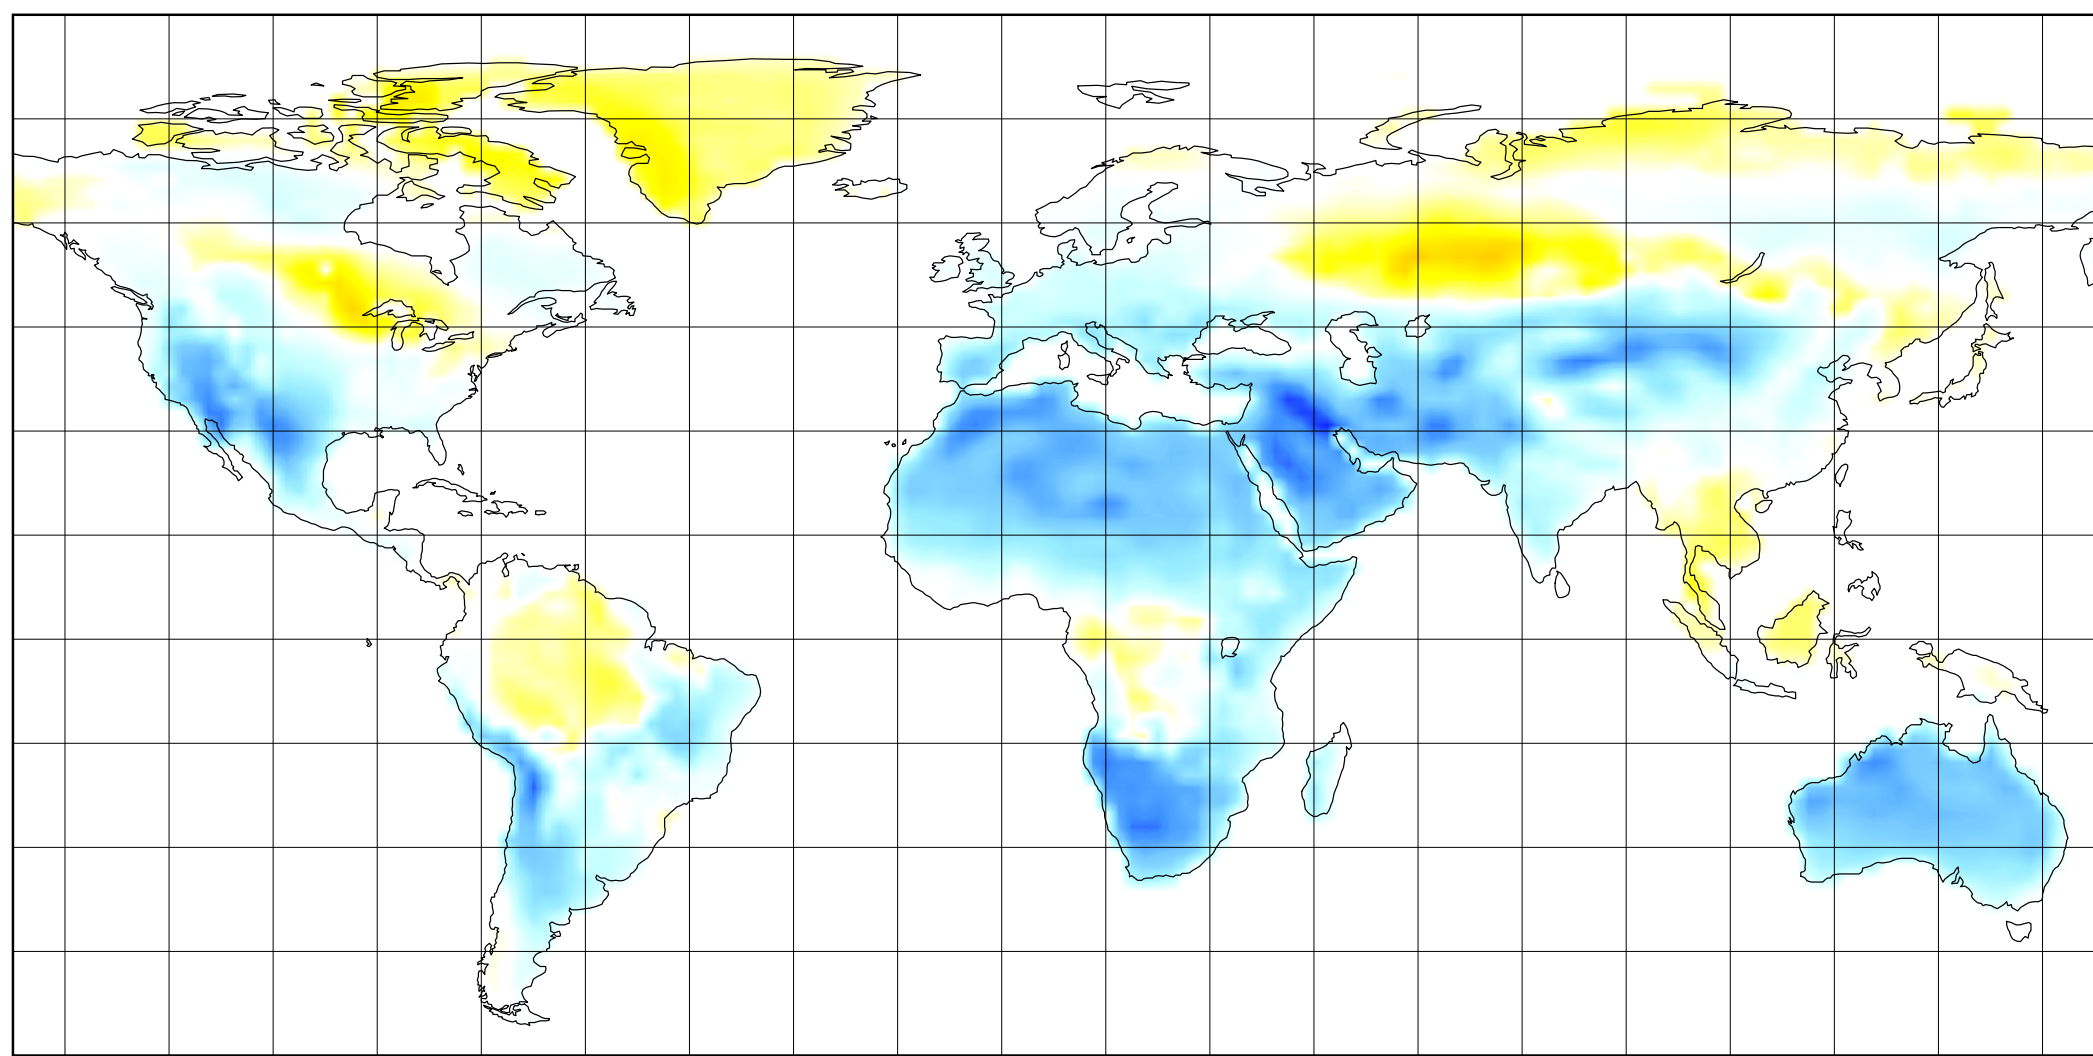

$\Delta T$  (Skin - Reference) [K]

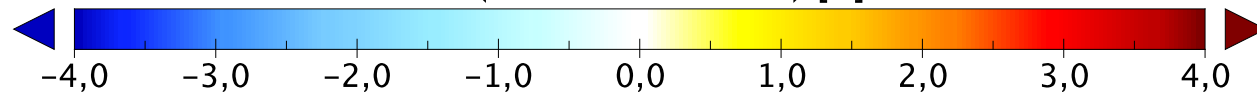

Supplement: Supplementary file 5 [file Skin-Ref.pdf › Heidkamp.et.al.2018.Suppl.Material.2.1/Global/Plots/Skin-Ref.pdf]

## Canopy Heat Storage (Pos)

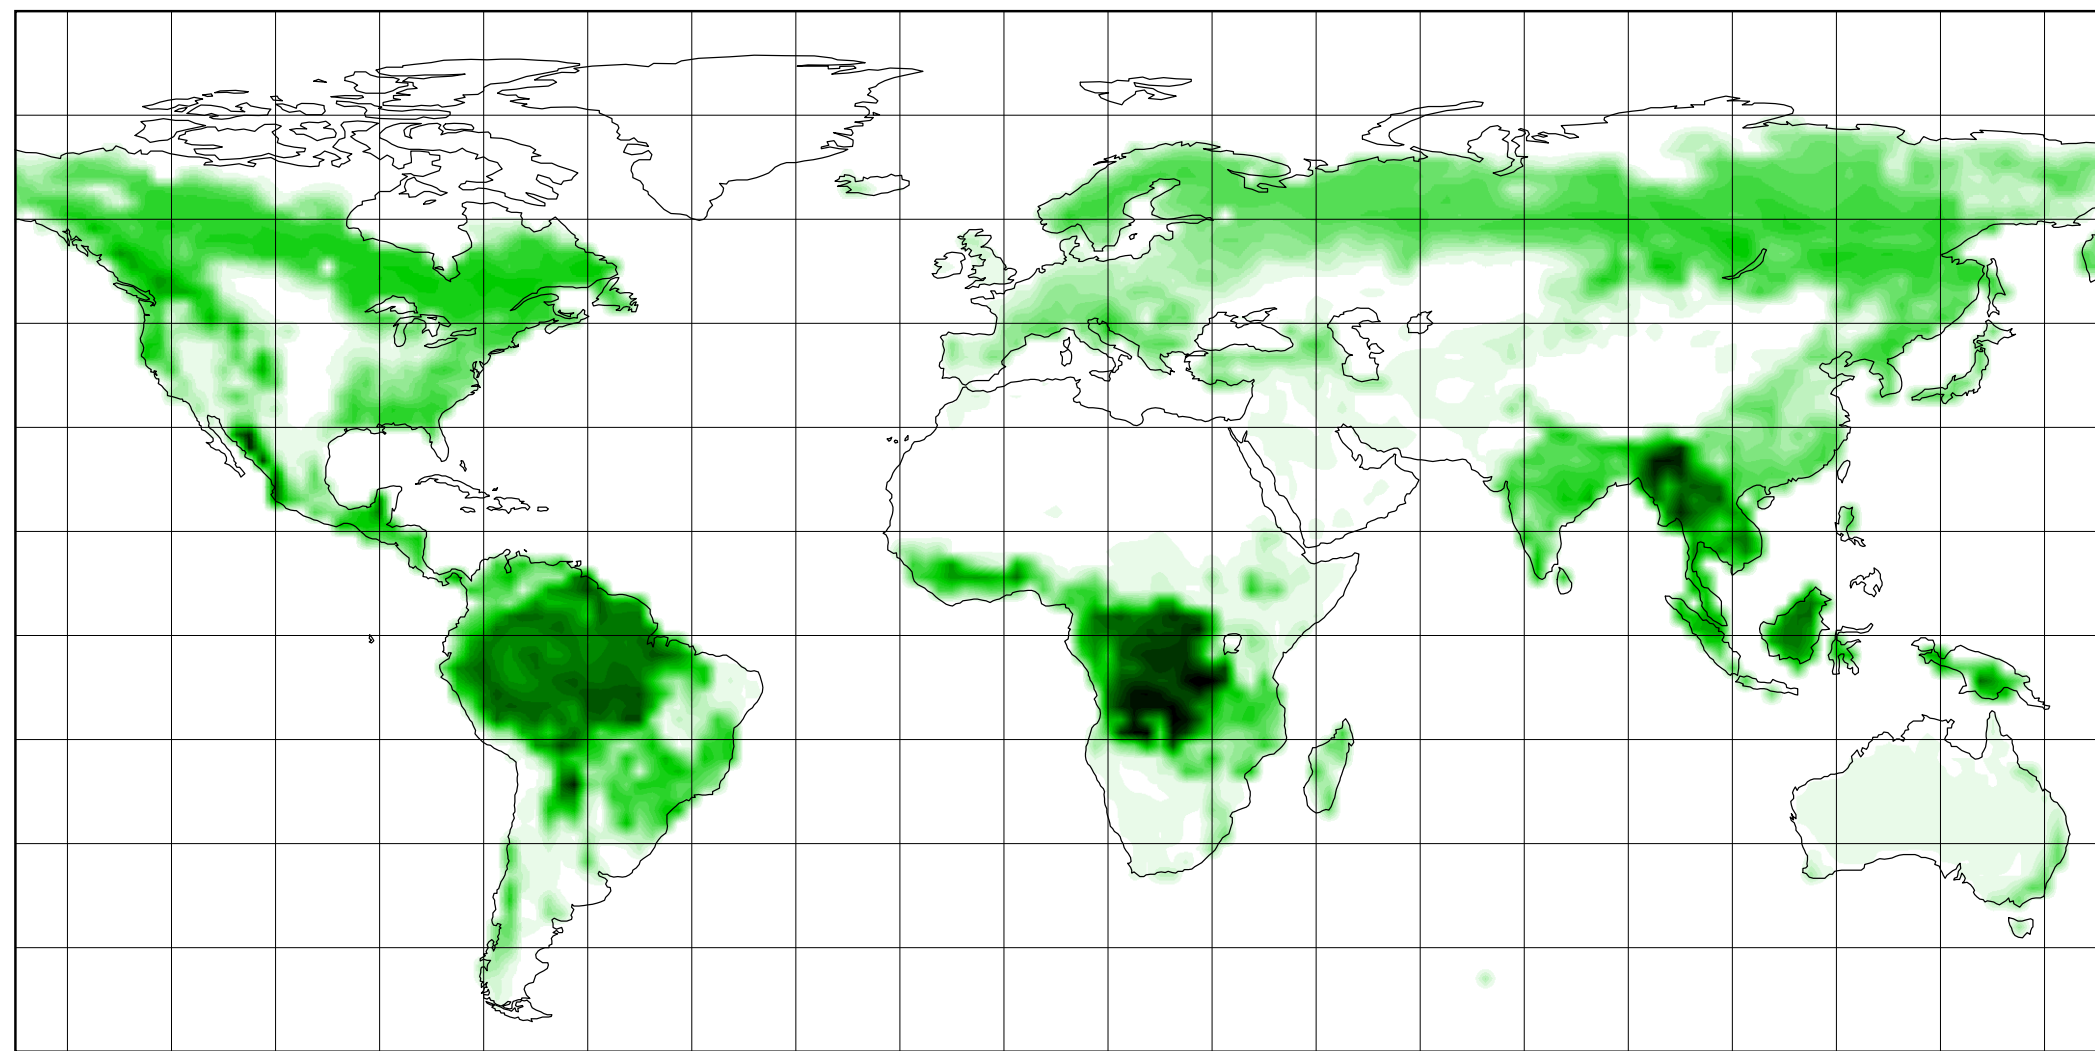

Canopy Heat Storage [ $\text{W}/\text{m}^2$ ]

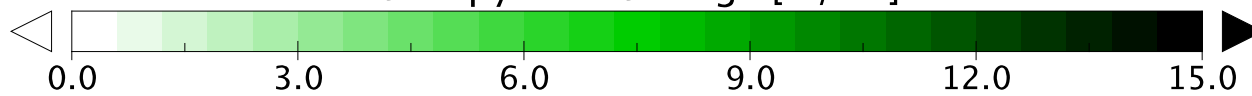

Data Min = 0.0, Max = 15.5

Supplement: Supplementary file 6 [file canoStor.pdf › Heidkamp.et.al.2018.Suppl.Material.2.1/Global/Plots/canoStor.pdf]

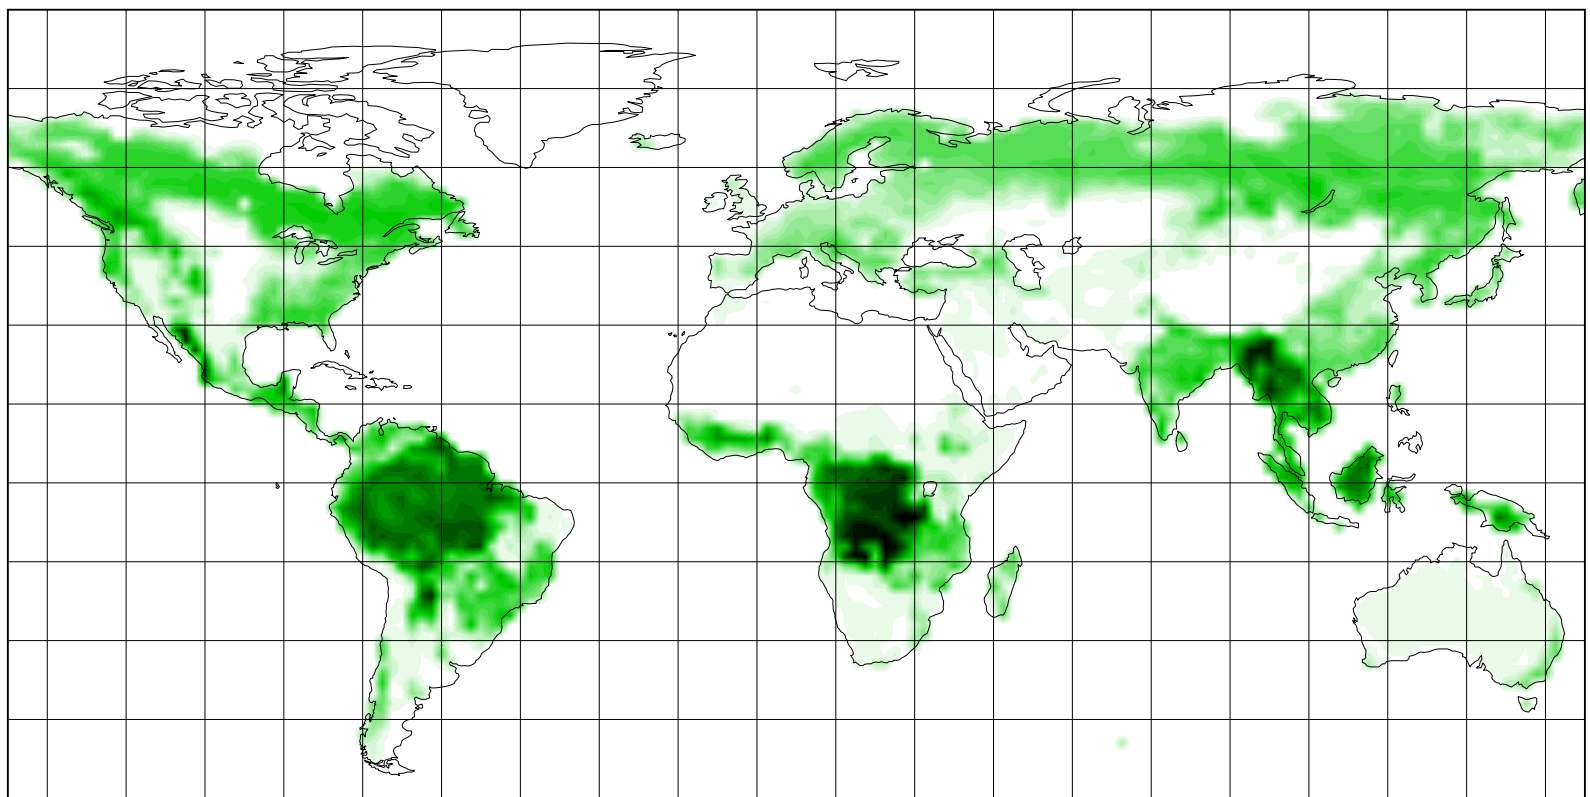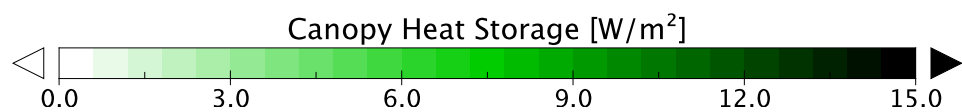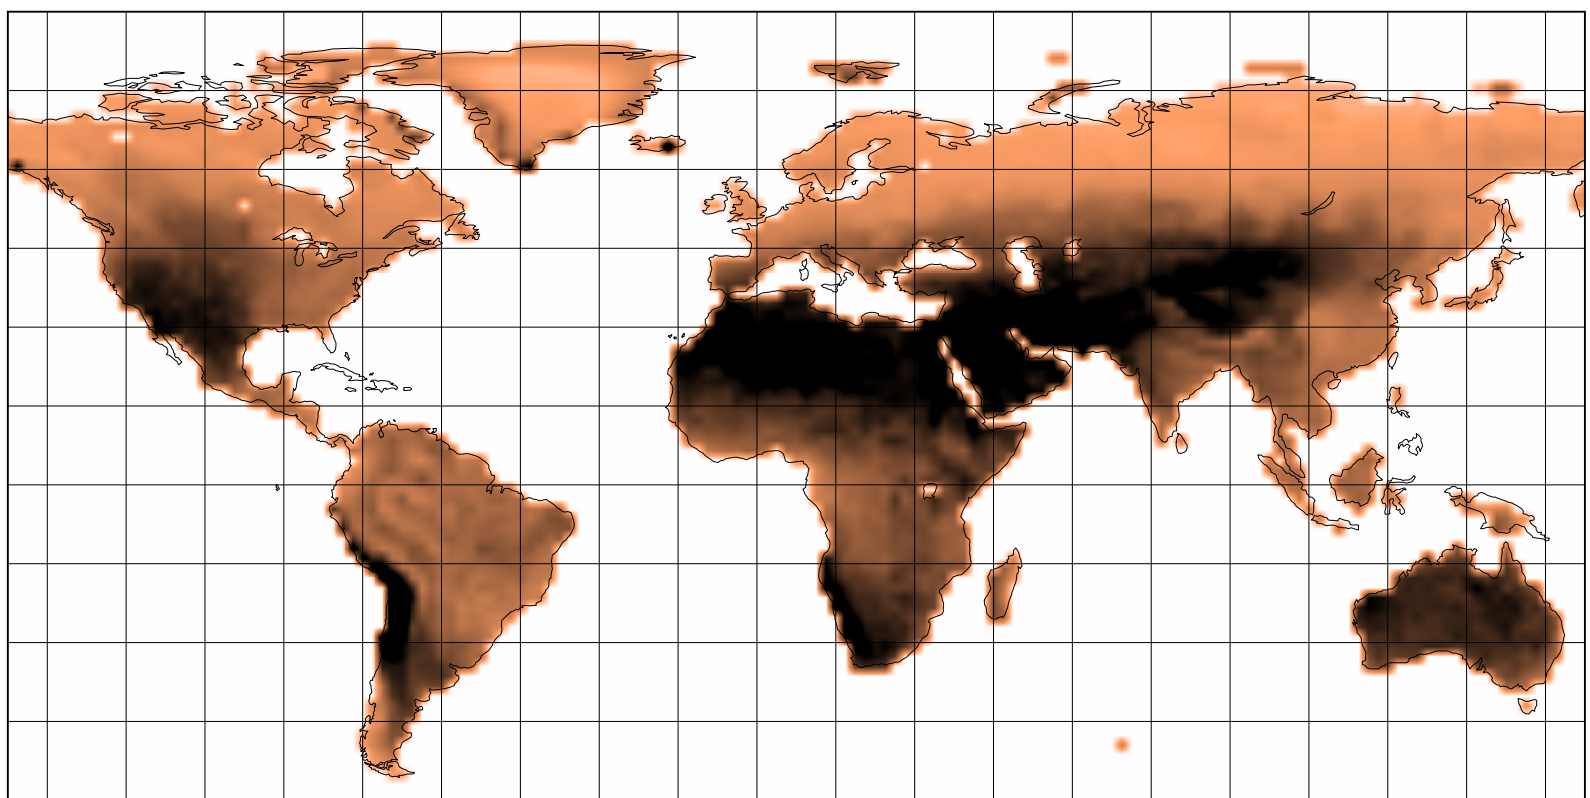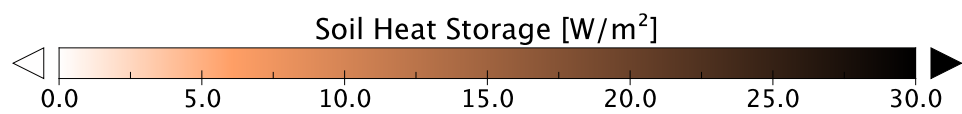

Supplement: Supplementary file 7 [file fig04.pdf › Heidkamp.et.al.2018.Suppl.Material.2.1/Global/Plots/fig04.pdf]

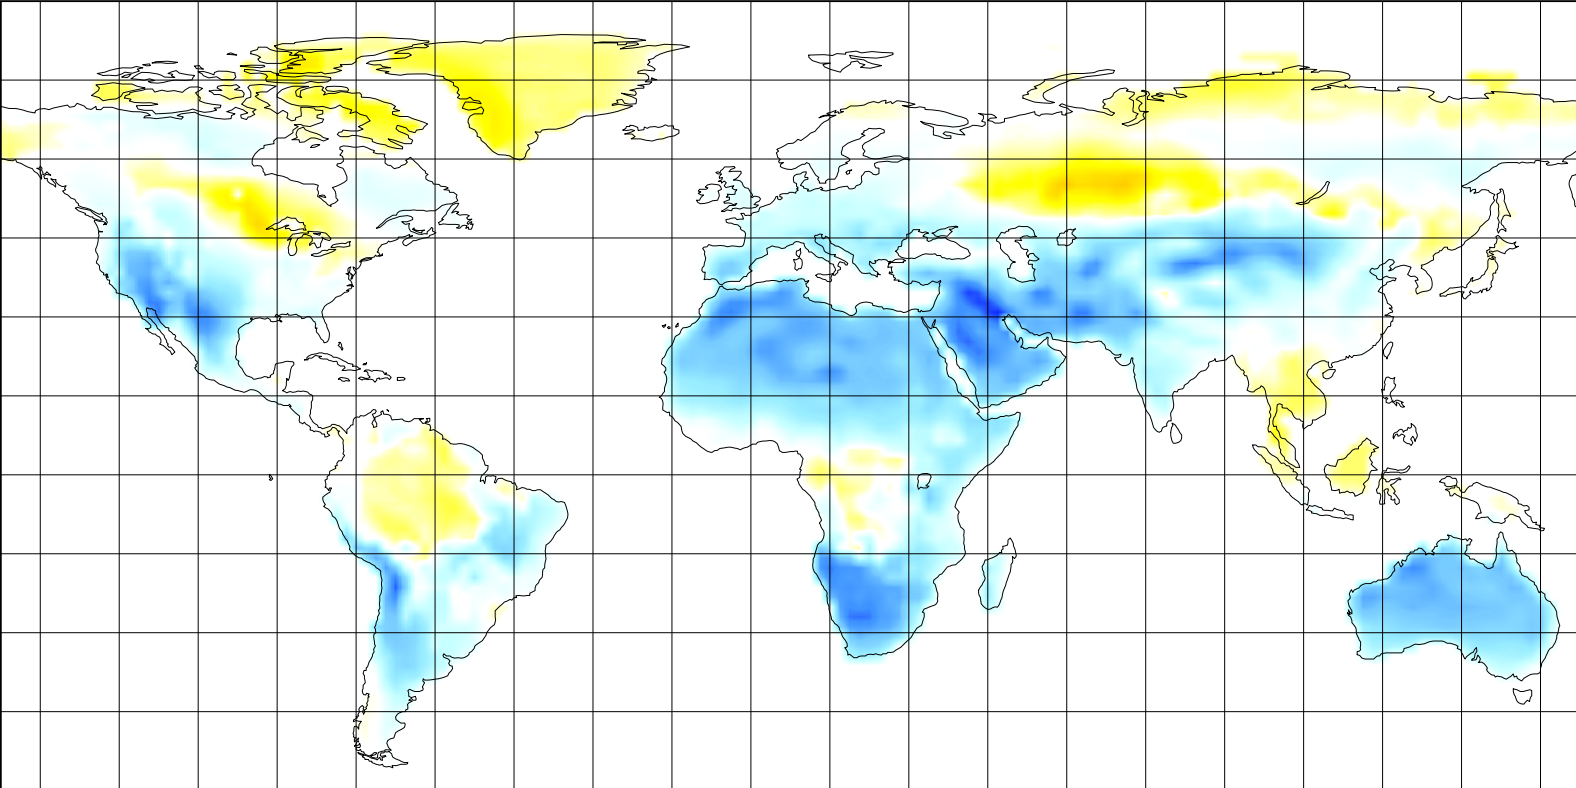

$\Delta T$  (Skin - Reference) [K]

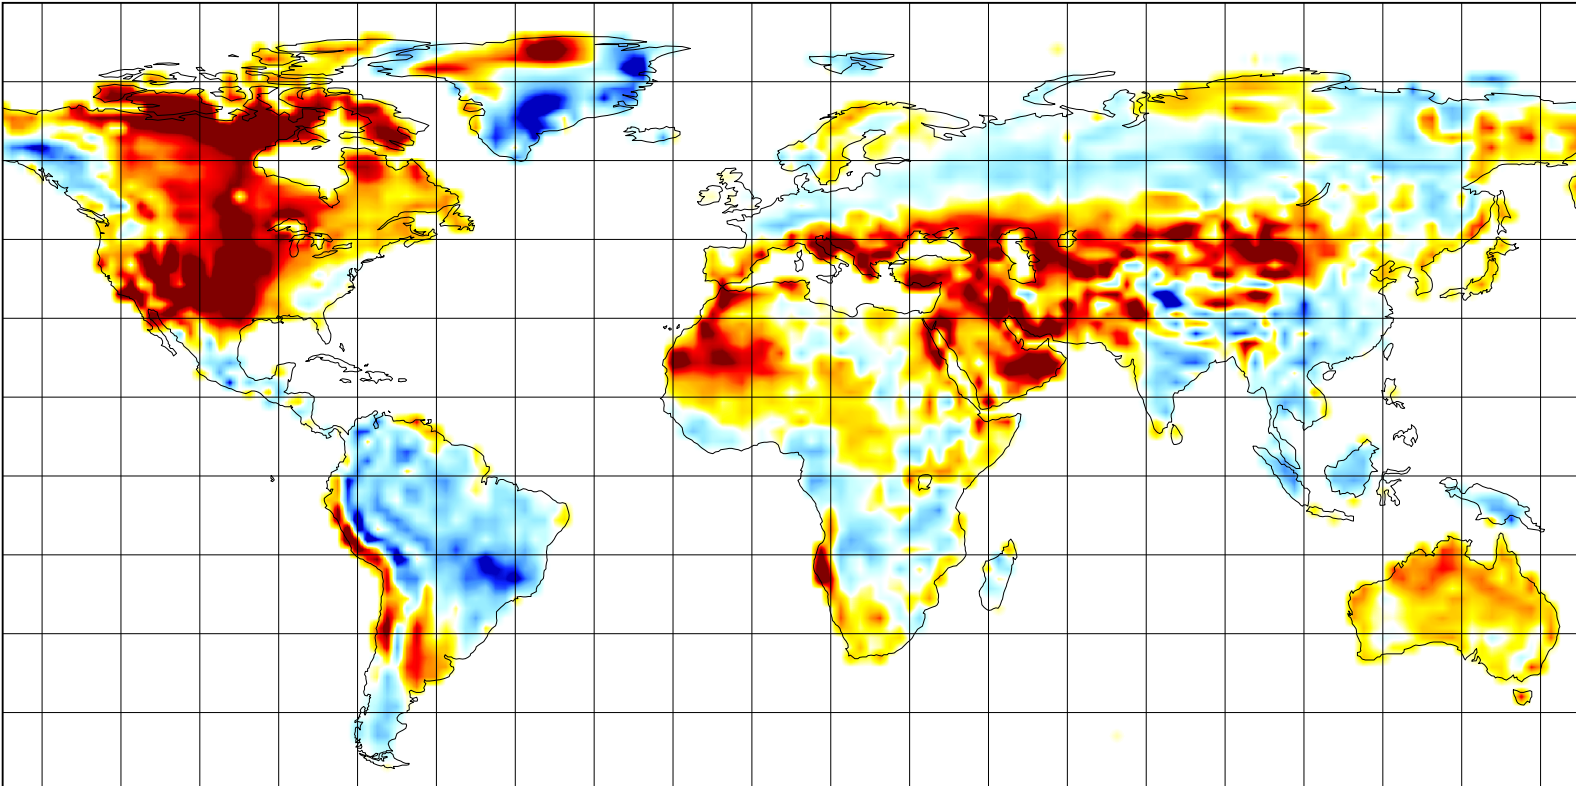

$\Delta T$  (Reference - Observations) [K]

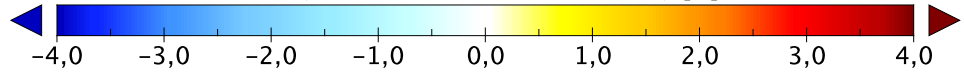

Supplement: Supplementary file 8 [file fig05.pdf › Heidkamp.et.al.2018.Suppl.Material.2.1/Global/Plots/fig05.pdf]

## Soil Heat Storage (Pos)

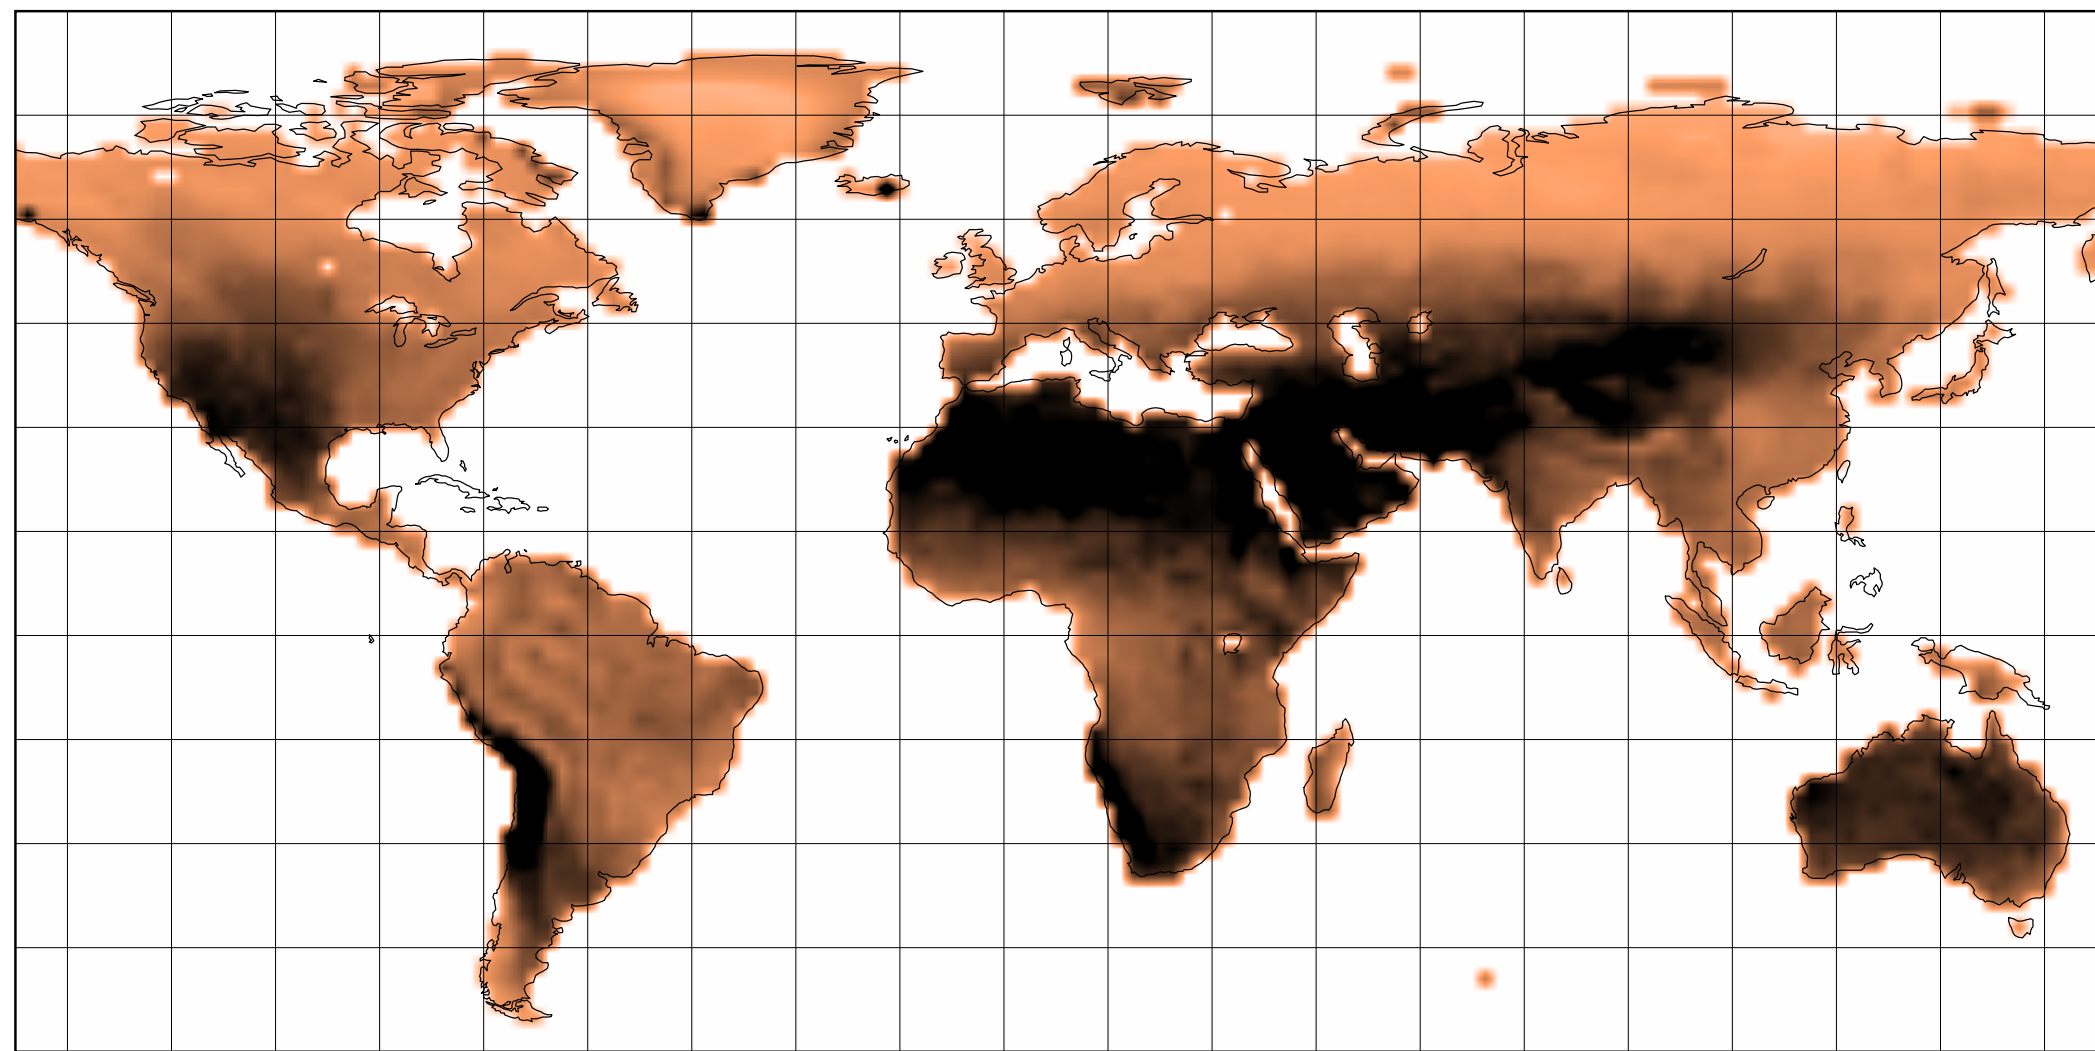

Soil Heat Storage [ $\text{W/m}^2$ ]

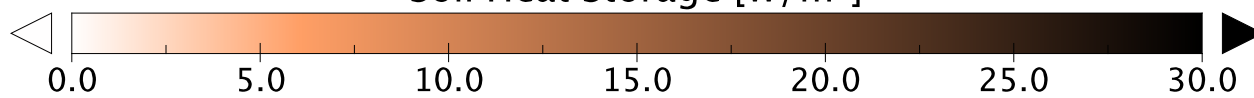

Data Min = 0.0, Max = 50.2

Supplement: Supplementary file 9 [file soilStor.pdf › Heidkamp.et.al.2018.Suppl.Material.2.1/Global/Plots/soilStor.pdf]
